# Supplementary material for: A restructuring of microbiome niche space is associated with Elexacaftor-Tezacaftor-Ivacaftor therapy in the cystic fibrosis lung✩
Source: PubMed Central journal article supplement — J Cyst Fibros. Author manuscript; Available in PMC 2022 Dec 6. (PMC9124239; doi:10.1016/j.jcf.2021.11.003), 2021-11-22

sh037\_t#3269 RT: 7.27 AV: 1 NL: 3.67E6  
T: FTMS + p ESI d Full ms2 393.2172@hcd40.00 [50.0000-420.0000]

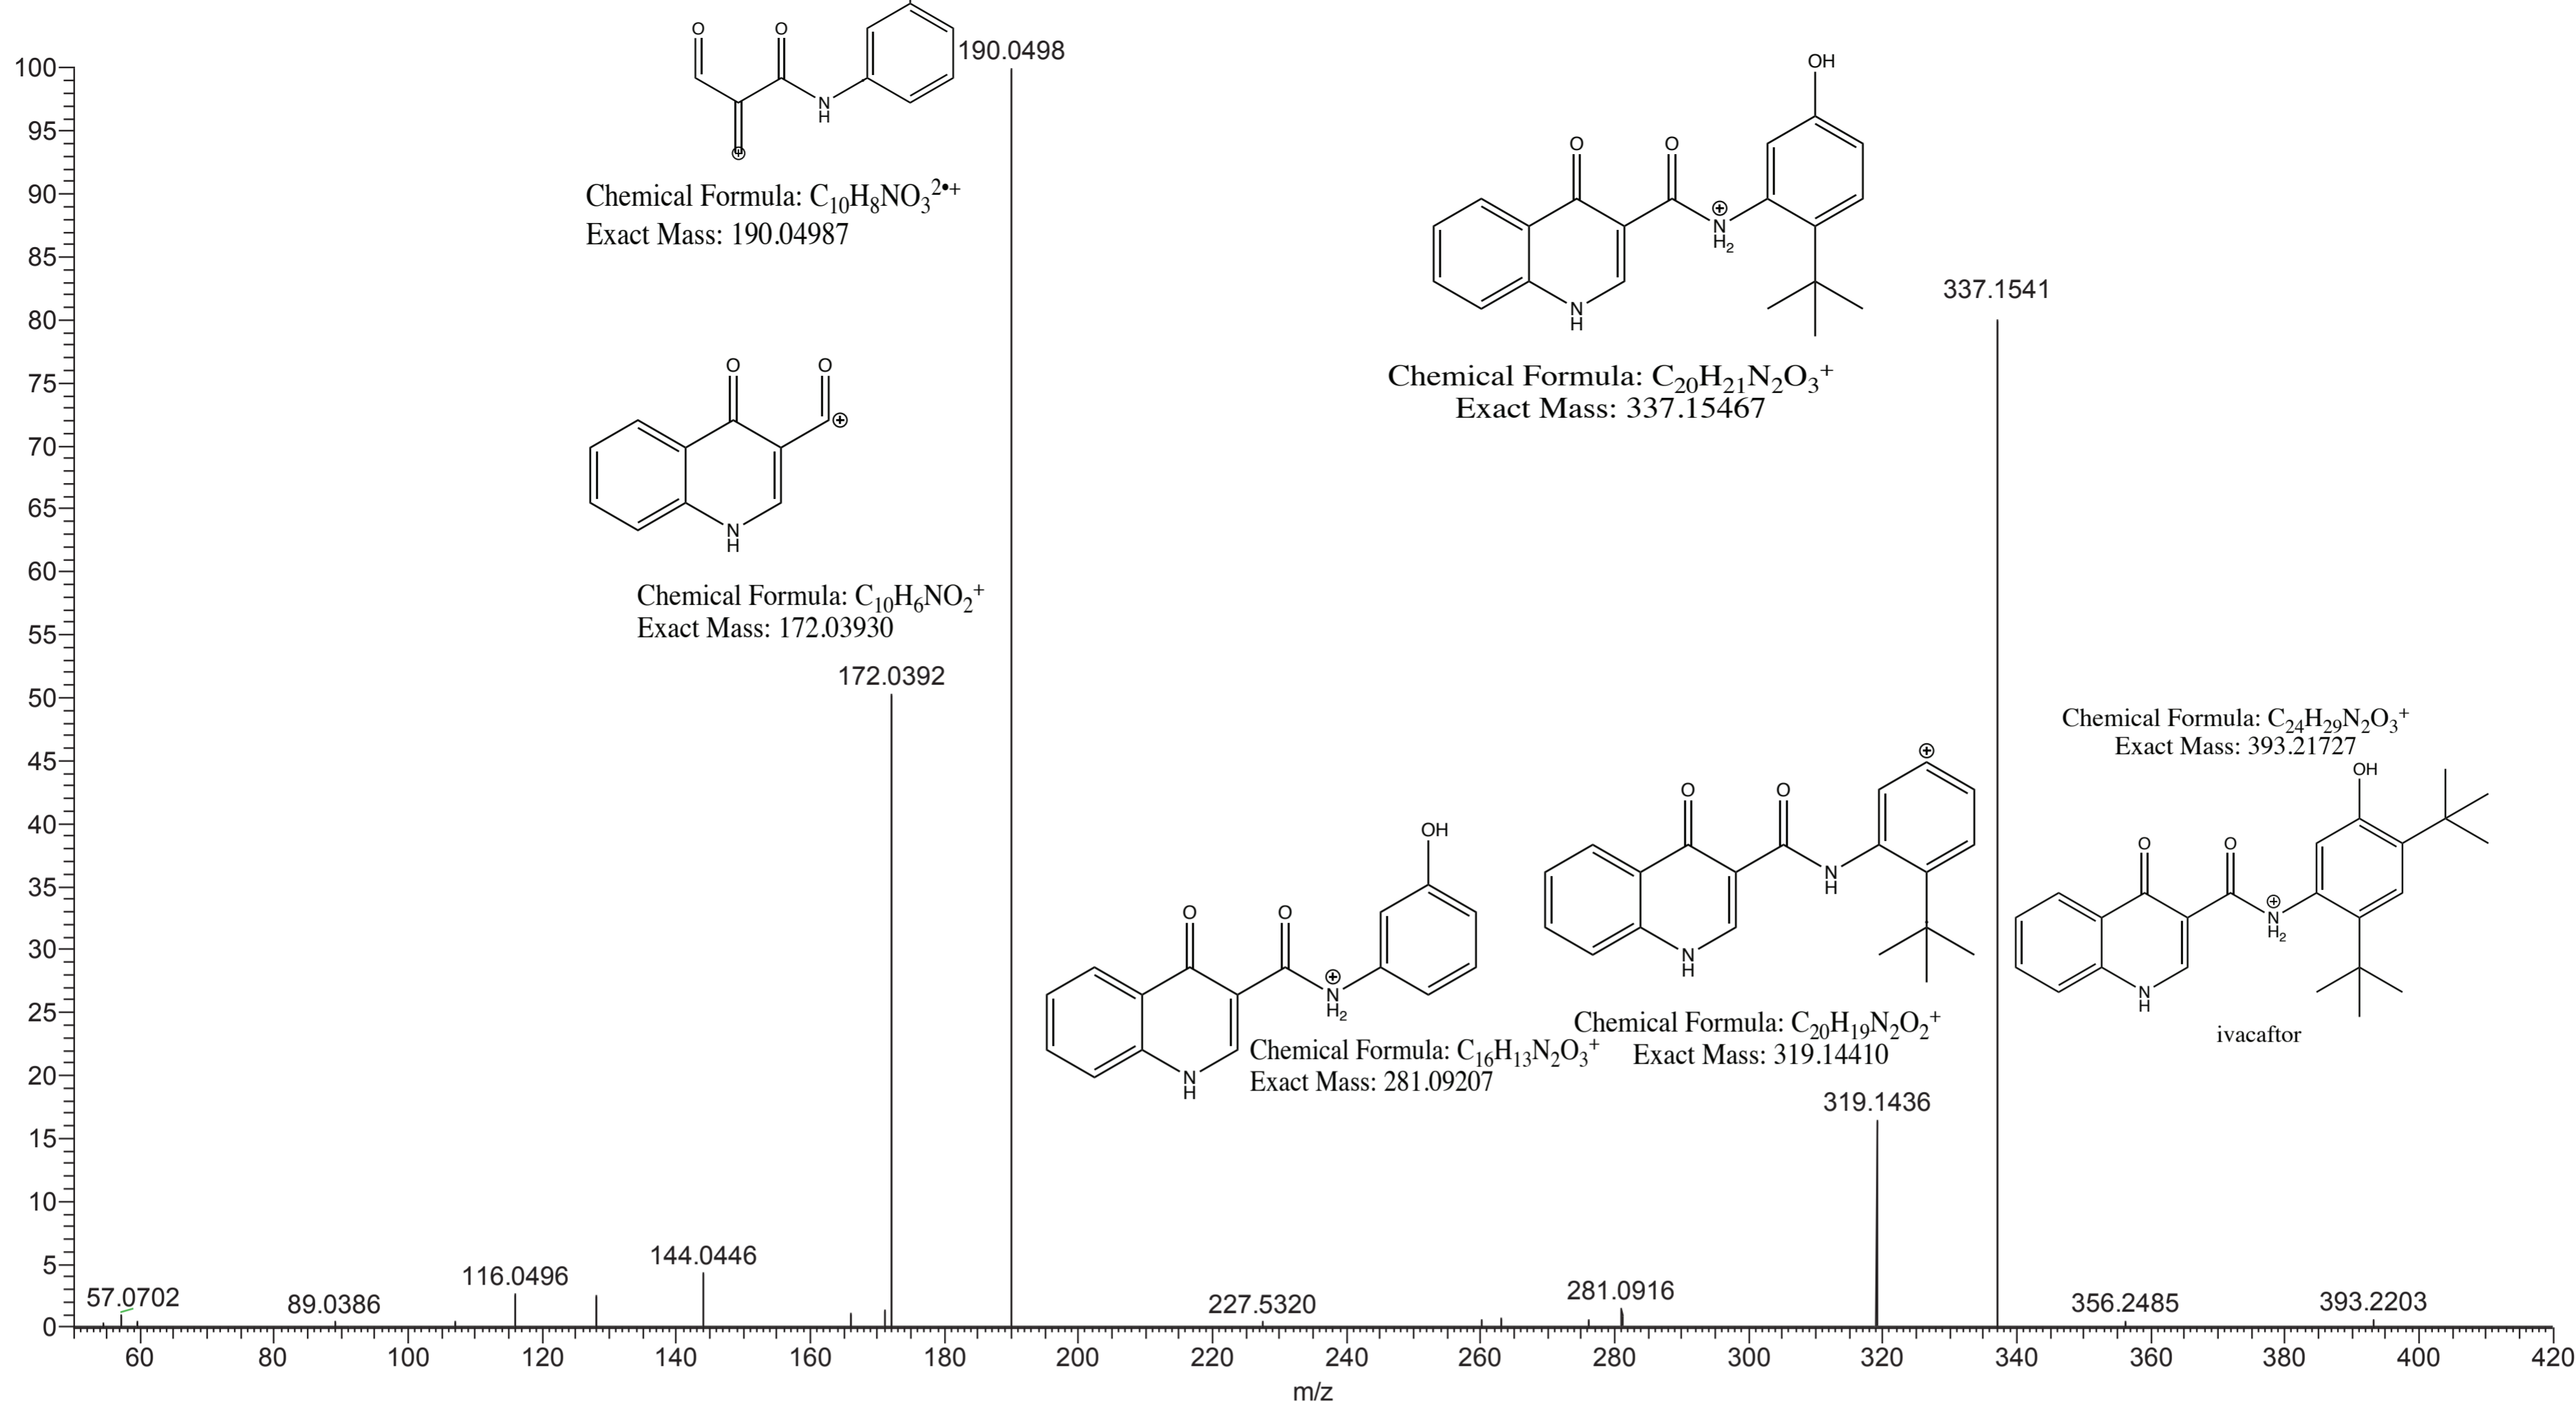

sh037\_t#2839 RT: 6.44 AV: 1 NL: 5.22E4  
T: FTMS + p ESI d Full ms2 407.1963@hcd40.00 [50.0000-435.0000]

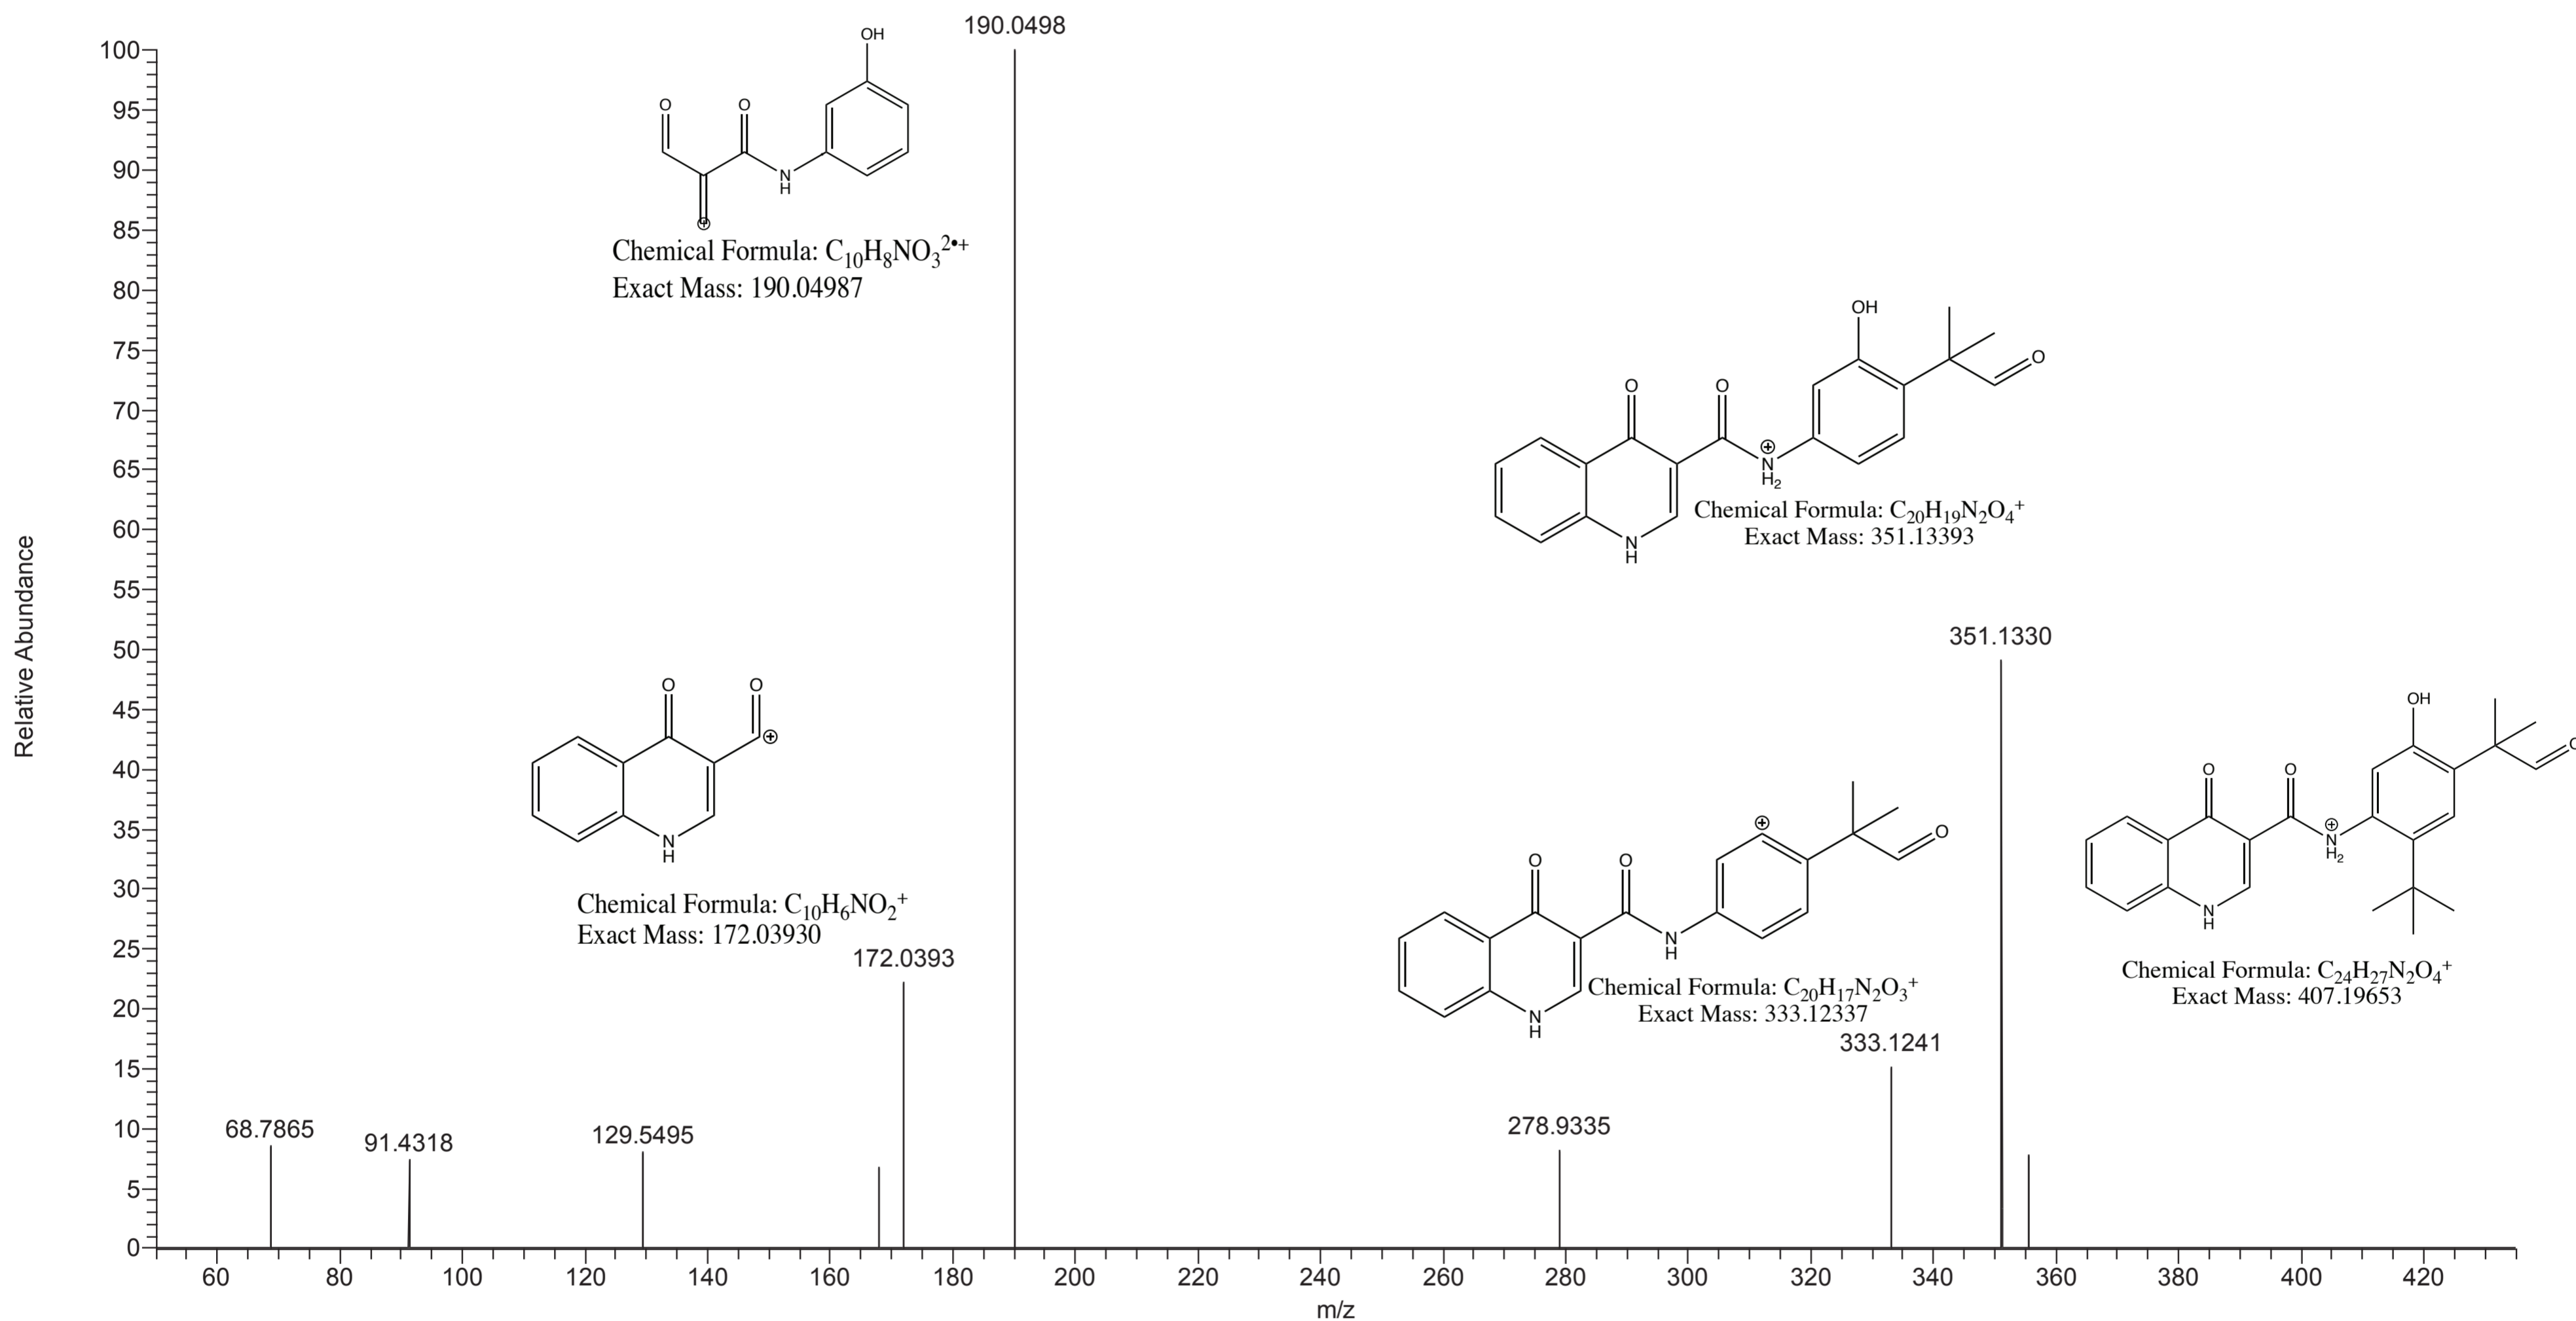

sh037\_t#2756 RT: 6.27 AV: 1 NL: 2.15E4  
T: FTMS + p ESI d Full ms2 425.2067@hcd40.00 [50.0000-450.0000]

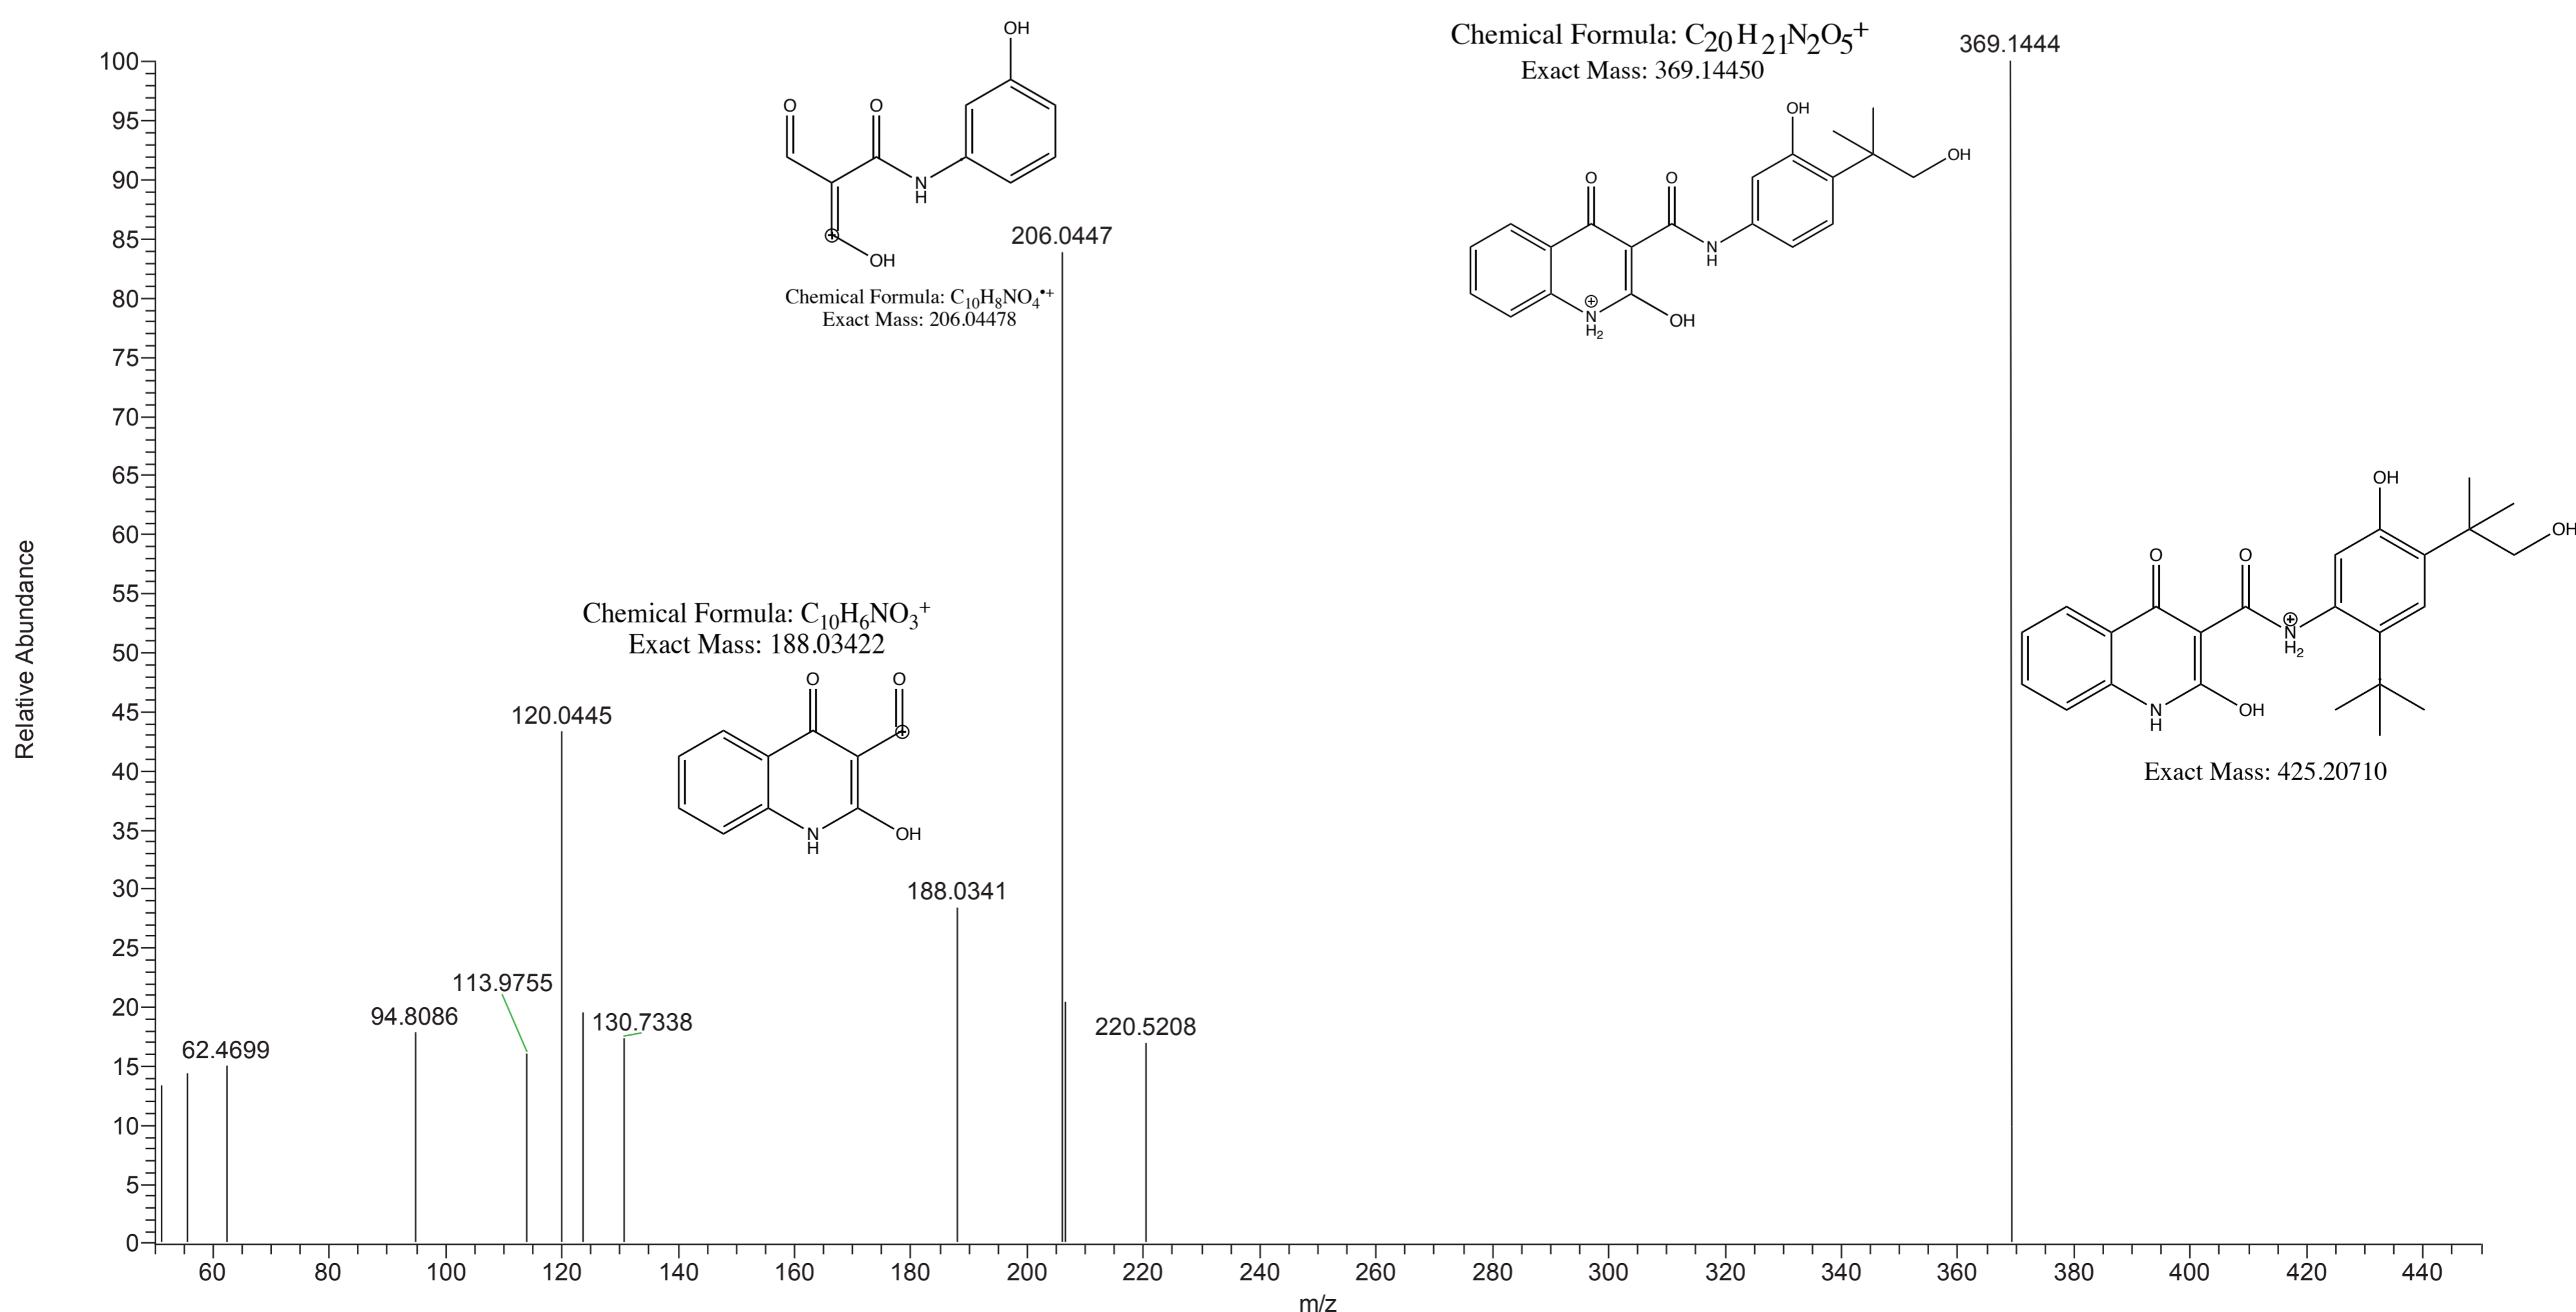

Supplement: NIHMS1759003-supplement-MMC5.pdf [file NIHMS1759003-supplement-MMC5.pdf]
