# Supplementary figures and images for: A restructuring of microbiome niche space is associated with Elexacaftor-Tezacaftor-Ivacaftor therapy in the cystic fibrosis lung✩
Source: PubMed Central journal article supplement — J Cyst Fibros. Author manuscript; Available in PMC 2022 Dec 6. (PMC9124239; doi:10.1016/j.jcf.2021.11.003), 2021-11-22

NS

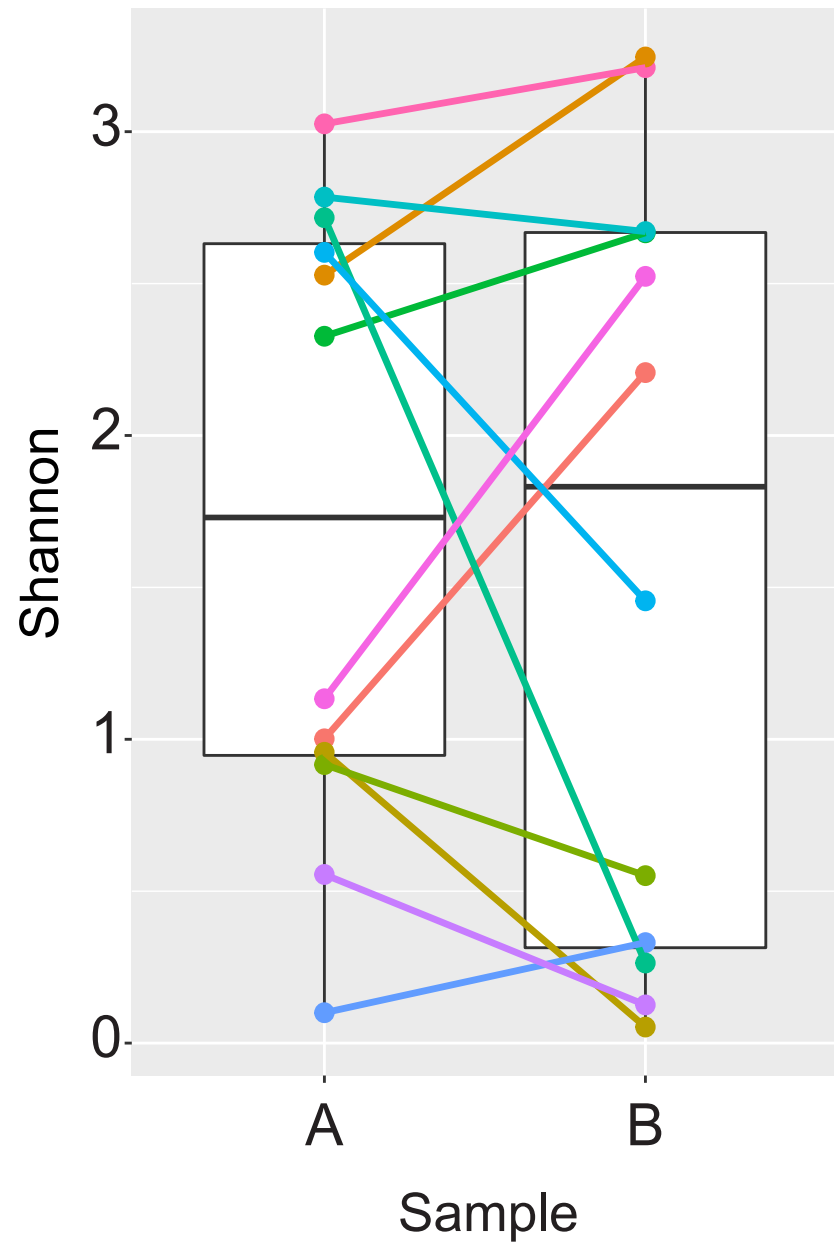

NS

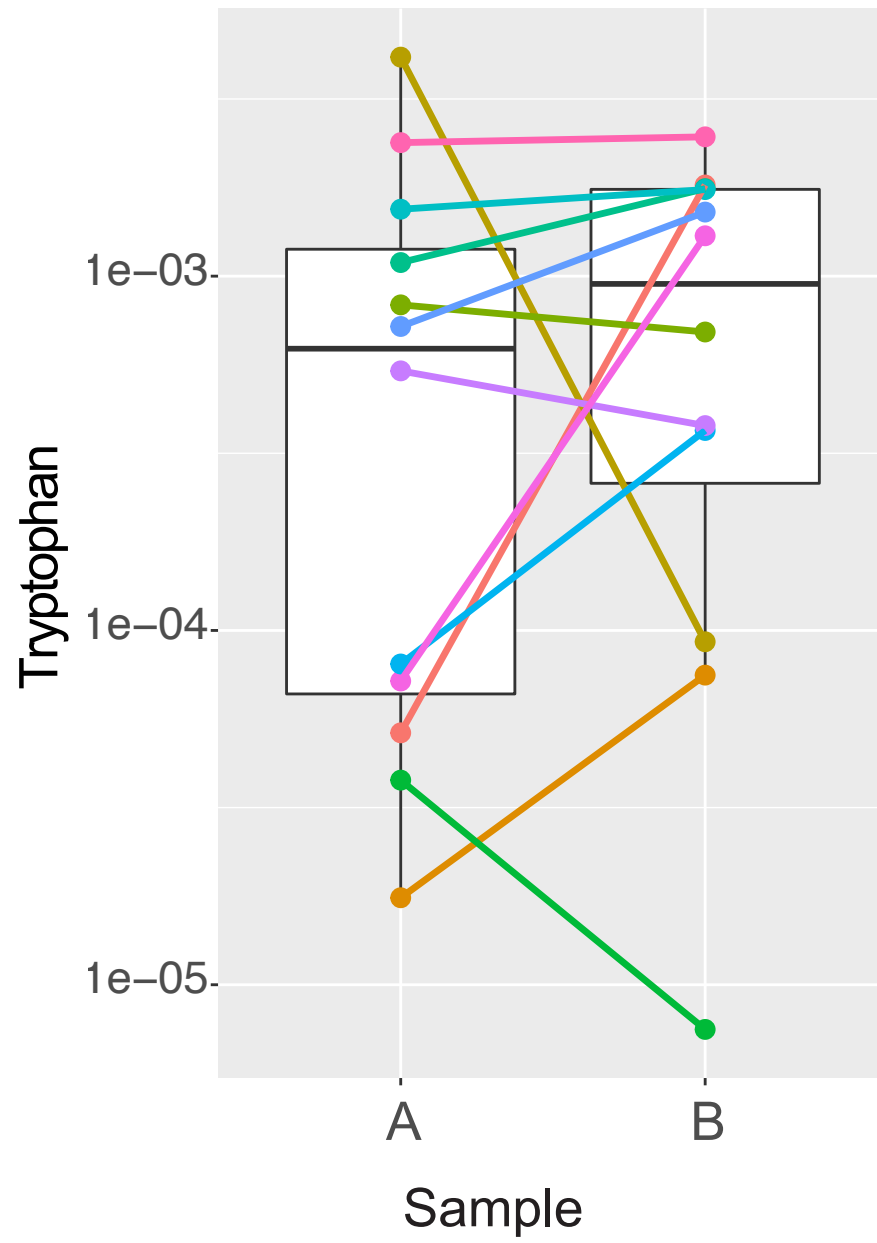

NS

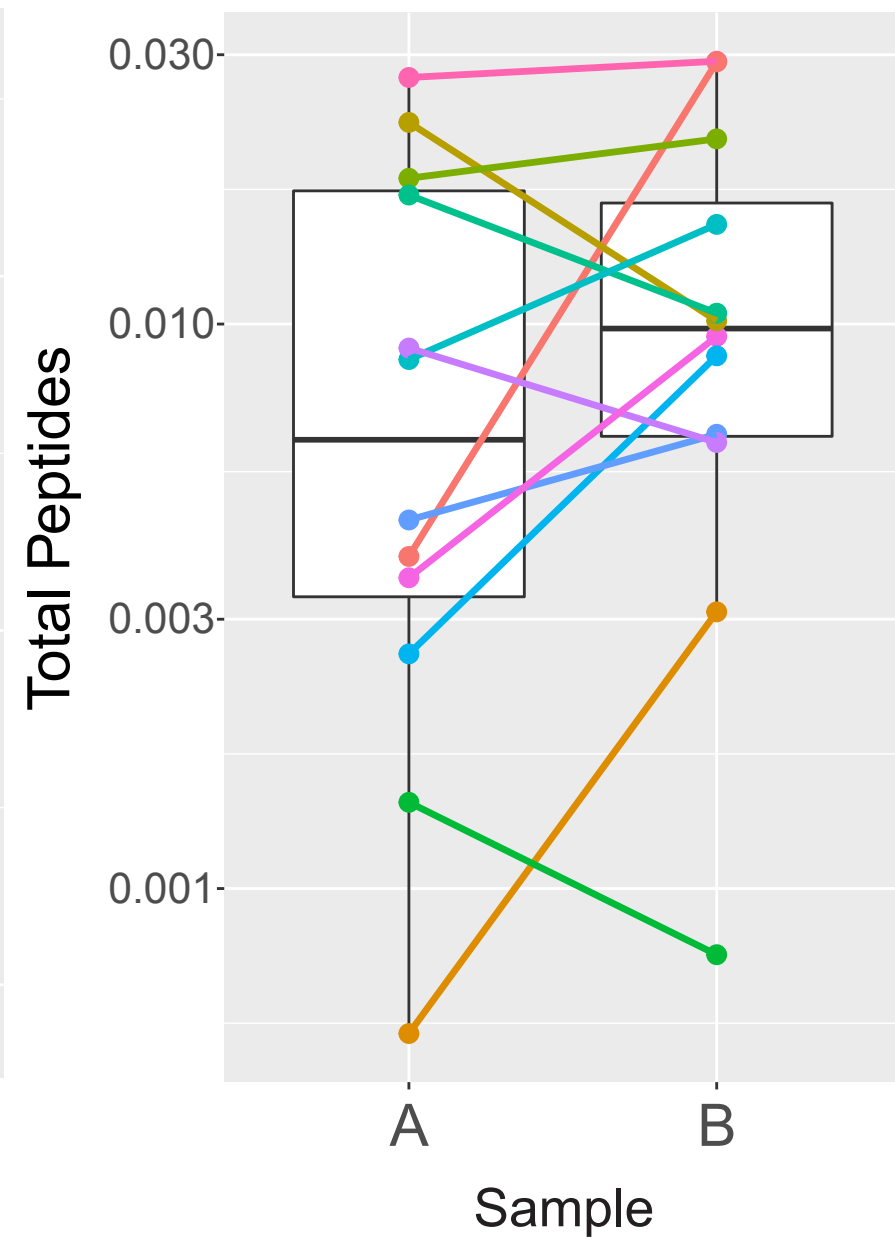

Supplement: NIHMS1759003-supplement-MMC2.pdf [file NIHMS1759003-supplement-MMC2.pdf]

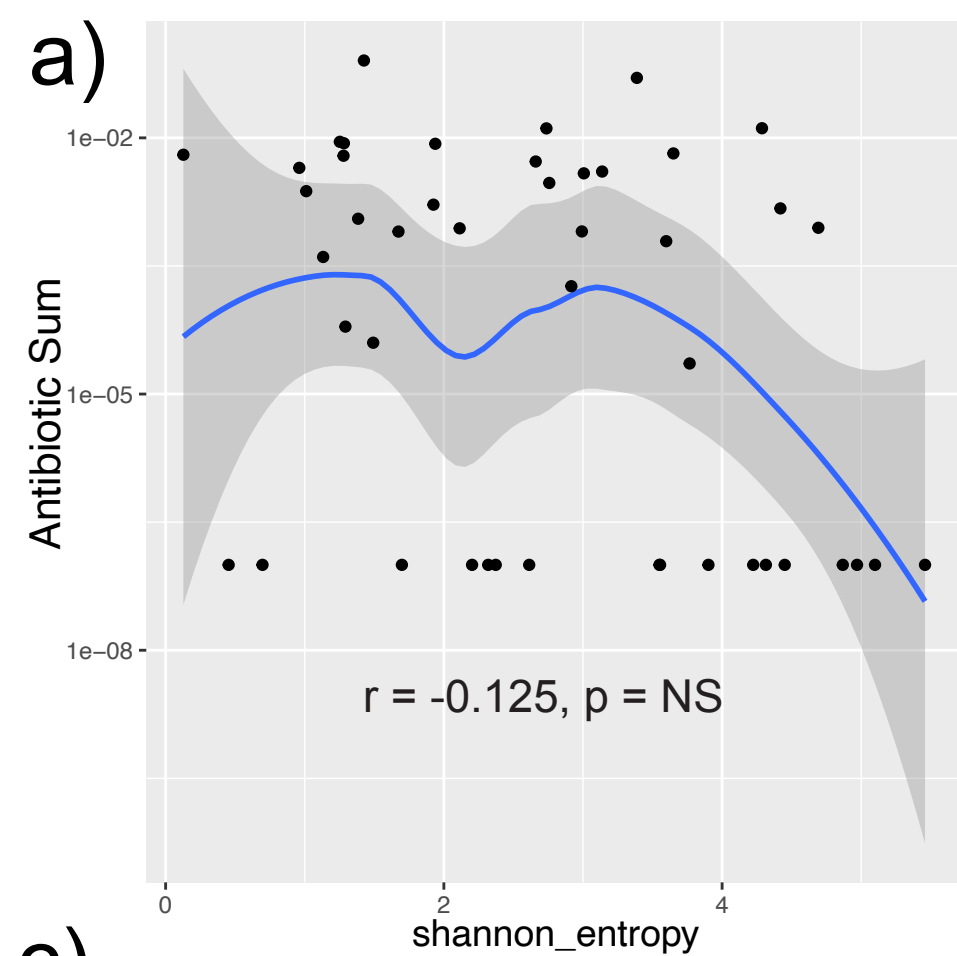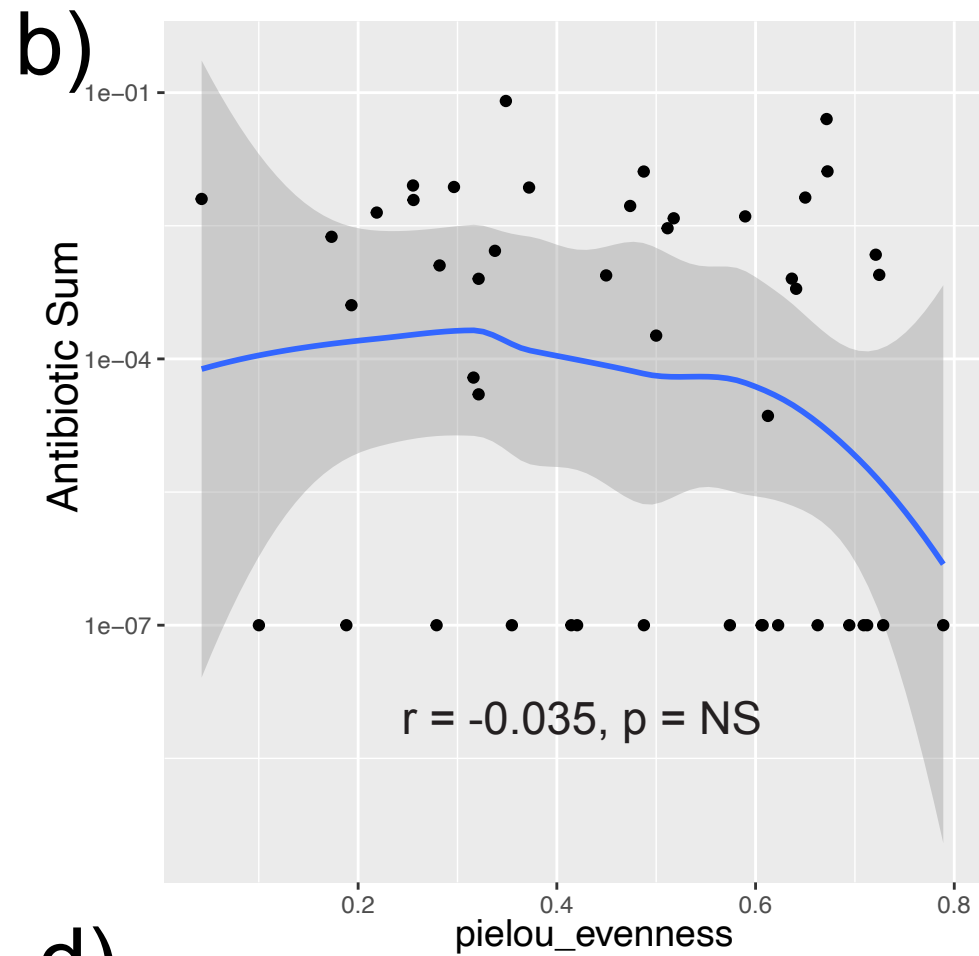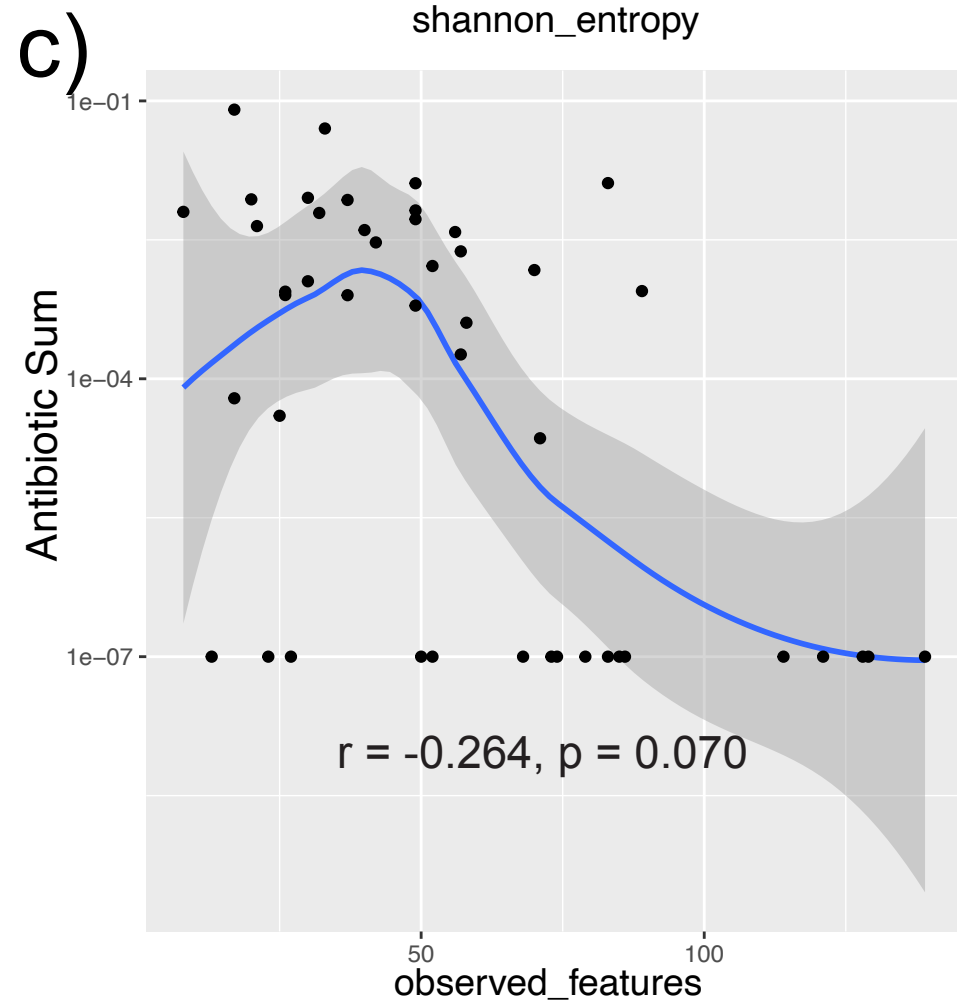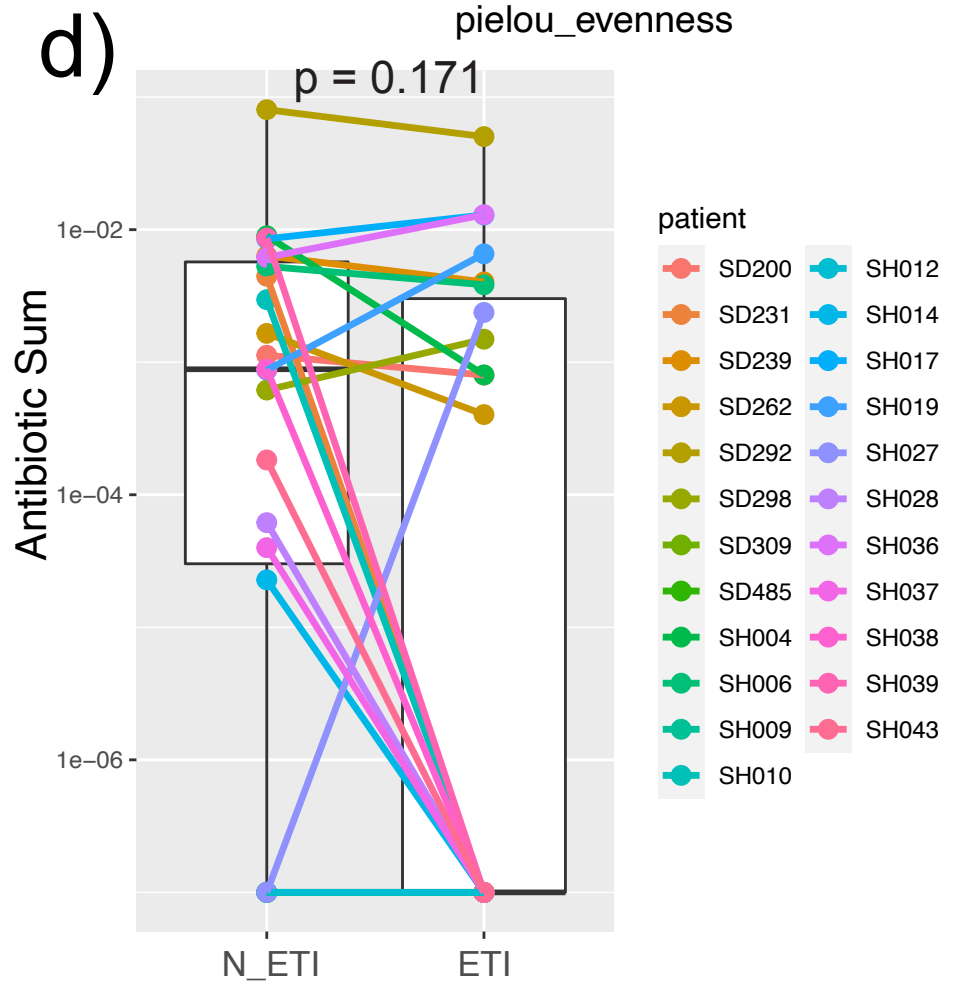

Supplement: NIHMS1759003-supplement-MMC3.pdf [file NIHMS1759003-supplement-MMC3.pdf]

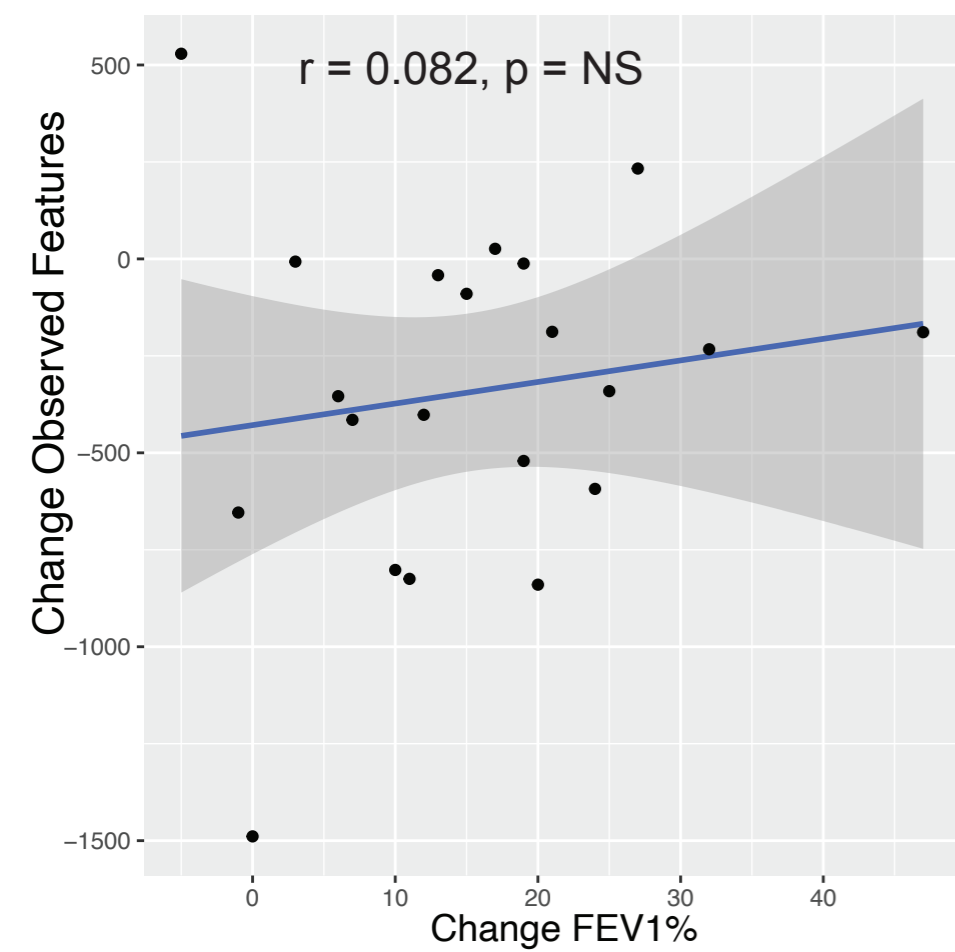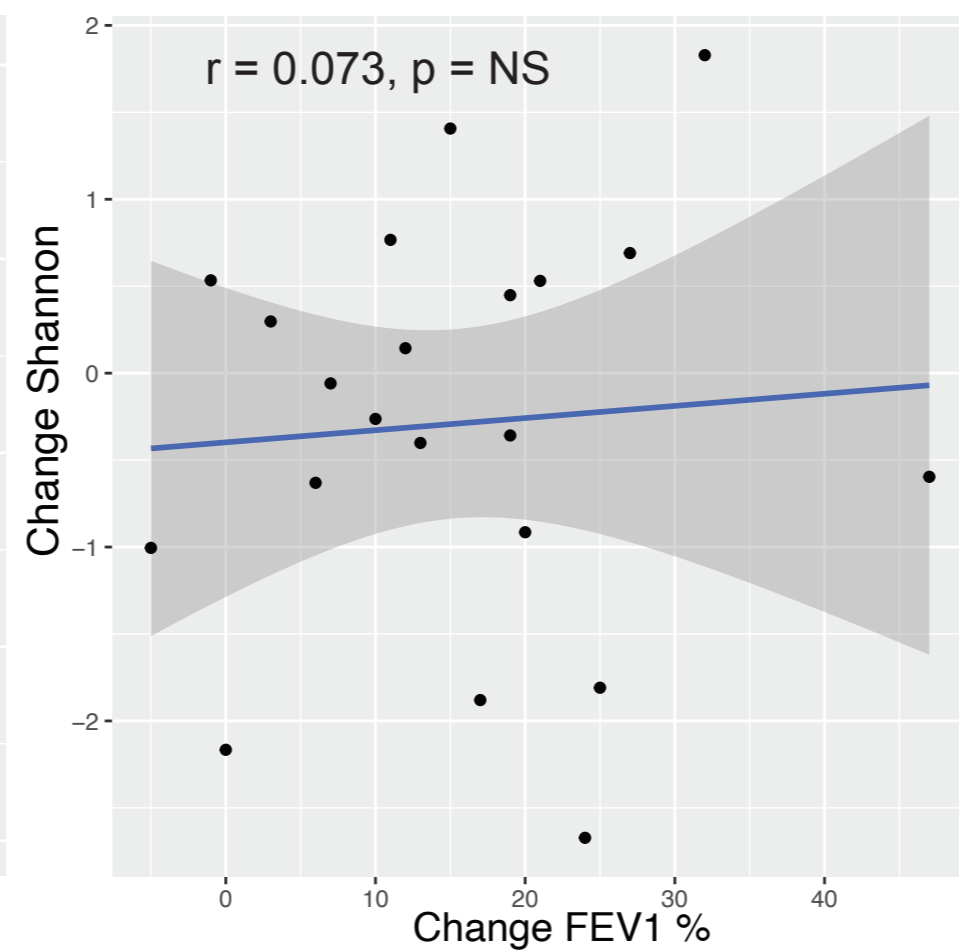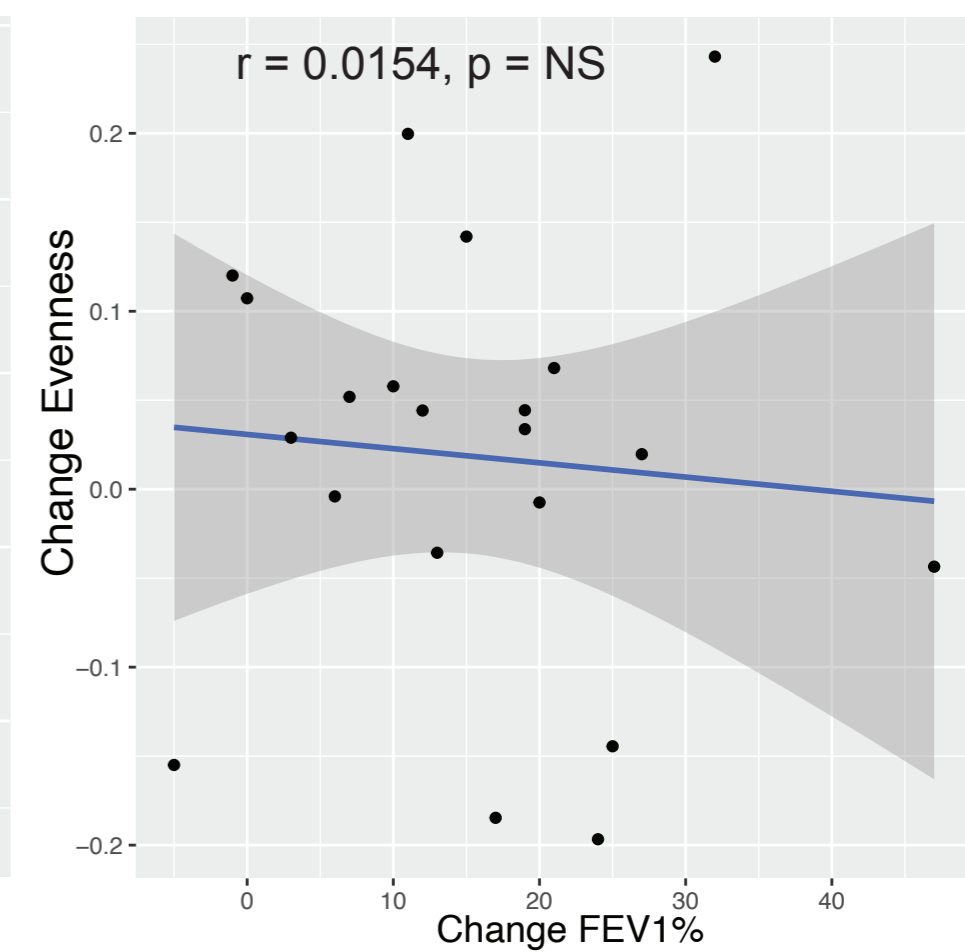

Supplement: NIHMS1759003-supplement-MMC4.pdf [file NIHMS1759003-supplement-MMC4.pdf]

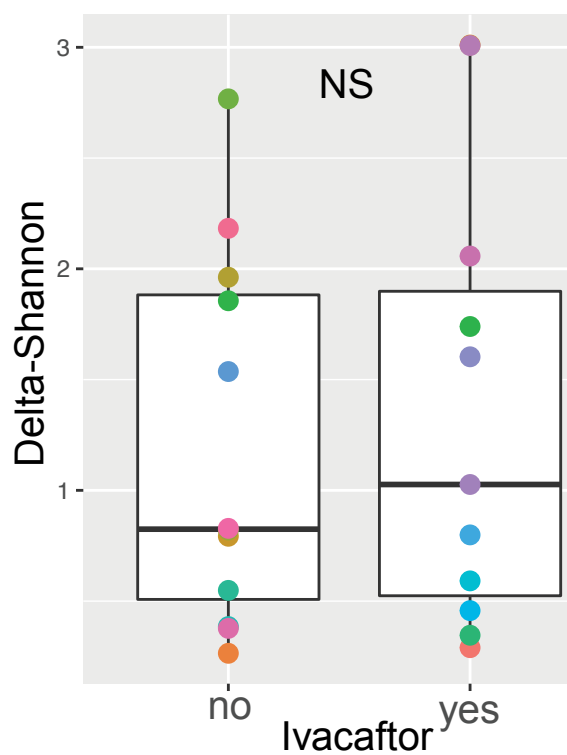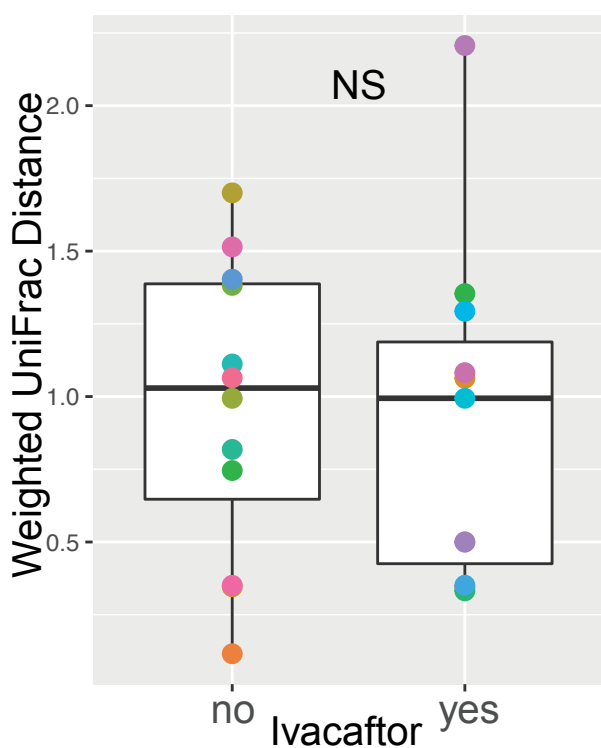

Patient

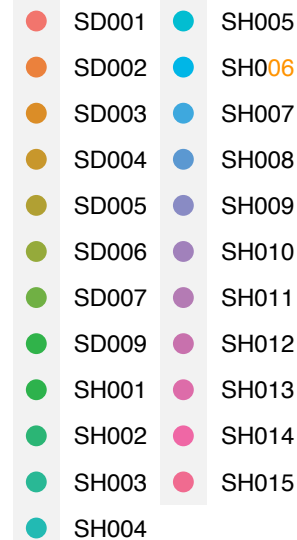

Supplement: NIHMS1759003-supplement-MMC6.pdf [file NIHMS1759003-supplement-MMC6.pdf]
